# Supplementary material for: Greatly improving energy storage density and reducing dielectric loss of carbon nanotube/cyanate ester composites through building a unique tri-layered structure with mica paper
Source: Royal Society of Chemistry journal article supplement (doi:10.1039/c7ta07263e), 2017-01-01
Supplement: c7ta07263e1.pdf [file c7ta07263e1.pdf]

Supporting Information

**Greatly improving energy storage density and reducing dielectric loss of carbon nanotube/cyanate ester composites through building unique tri-layered structure with mica paper**

**Xiaobao Zhang, Li Yuan, Qingbao Guan, Guozheng Liang\* and Aijuan Gu\***

State and Local Joint Engineering Laboratory for Novel Functional Polymeric Materials  
Jiangsu Key Laboratory of Advanced Functional Polymer Design and Application  
Department of Materials Science and Engineering  
College of Chemistry, Chemical Engineering and Materials Science  
Soochow University, Suzhou 215123, China.

\*To whom all correspondence should be addressed

Tel: +86 512 65880967

Fax: +86 512 65880089

Email: lgzheng@suda.edu.cn (Guozheng Liang), ajgu@suda.edu.cn (Aijuan Gu).

**Table S1** Dielectric constants of multi-layer structure composites in literature. <sup>a)</sup>

| Conductor <sup>b)</sup><br>(content, wt%) | Polymer<br>matrix <sup>c)</sup> | Insulating<br>Layer <sup>d)</sup> | Number<br>of layers | Dielectric<br>constant<br>(100 Hz) | Dielectric<br>loss<br>(100 Hz) | Improvement of<br>energy storage<br>density <sup>e)</sup> | Ref          |
|-------------------------------------------|---------------------------------|-----------------------------------|---------------------|------------------------------------|--------------------------------|-----------------------------------------------------------|--------------|
| CNF (3)                                   | PVDF                            | PVDF                              | 3                   | ~79                                | ~0.21                          | /                                                         | S1           |
| GO (20)                                   | PVDF                            | BST/PVDF                          | 3                   | ~23                                | ~0.08                          | ~230%                                                     | S2           |
| CNT (10)                                  | PI                              | PI                                | 3                   | 31(1kHz)                           | 0.0016                         | <40%                                                      | S3           |
| CNT (0.6)                                 | CE                              | PE                                | 2                   | <168                               | ~0.007                         | /                                                         | S4           |
| CB (15)                                   | PP                              | PP                                | 128                 | 128                                | /                              | /                                                         | S5           |
| CB (15)                                   | PVDF                            | PVDF                              | 256                 | ~69                                | 0.05                           | /                                                         | S6           |
| GPN (/)                                   | CP                              | CP                                | 3                   | ~55                                | ~0.08                          | /                                                         | S7           |
| CNT sheet<br>(2.2)                        | PVDF                            | PVDF                              | 3                   | 32                                 | 0.08                           | /                                                         | S8           |
| CNT (0.6)                                 | PVDF                            | PVDF                              | 3                   | ~12                                | ~0.09                          | /                                                         | S9           |
| GR<br>(20.3vol%)                          | PVDF                            | BT/PVDF                           | 3                   | ~93                                | <0.05                          | /                                                         | S10          |
| CNT (0.6)                                 | CEP                             | MP                                | 3                   | 219                                | 0.4                            | 1550%                                                     | this<br>work |

- a) Multi-layer composites are composed of conductor/polymer layer and insulation layer. Some properties not reported directly in the references are derived from the corresponding curves, so the symbol “~” was used to indicate the datum is an approximate value.
- b) CNF: Carbon nanofiber.  
GO: Graphene oxide.  
CNT: Carbon nanotube.  
CB: Carbon black.  
GPN: Graphene.  
CNT sheet: Prepared by floating catalyst CVD growth method.  
GR: Graphite.
- c) PVDF: Poly(vinylidene fluoride).  
PI: Polyimide.  
CE: Cyanate ester.  
PP: Polypropylene.  
CP: 12 wt% cyanoethyl pullulan polymer.  
CEP: Epoxy modified cyanate ester.
- d) BST: Ba<sub>0.6</sub>Sr<sub>0.4</sub>TiO<sub>3</sub>.
- e) The magnitude of the increase compared to the energy storage density of conductor/polymer composite. The symbol “/” represents no data reported in the literature.

## References

- [S1] L. L. Sun, B. Li, Y. Zhao, G. Mitchell and W. H. Zhong, *Nanotechnology*, 2010, **21**, 1-8.
- [S2] Y. Shen, Y. Hu, W. Chen, J. Wang, Y. Guan, J. Du, X. Zhang, J. Ma, M. Li, Y. Lin, L.-q. Chen and C.-W. Nan, *Nano Energy*, 2015, **18**, 176-186.
- [S3] Y. Chen, B. Lin, X. Zhang, J. Wang, C. Lai, Y. Sun, Y. Liu and H. Yang, *J. Mater. Chem. A*, 2014, **2**, 14118.
- [S4] B. H. Wang, G. Z. Liang, Y. C. Jiao, A. J. Gu, L. M. Liu, L. Yuan and W. Zhang, *Carbon*, 2013, **54**, 224-233.
- [S5] W. Gao, Y. Zheng, J. Shen and S. Guo, *ACS Appl. Mater. Interfaces*, 2015, **7**, 1541-1549.
- [S6] J. Zhu, J. Shen, S. Guo and H.-J. Sue, *Carbon*, 2015, **84**, 355-364.
- [S7] J. Y. Kim, J. Lee, W. H. Lee, I. N. Kholmanov, J. W. Suk, T. Kim, Y. Hao, H. Chou, D. Akinwande and R. S. Ruoff, *ACS Nano*, 2014, **8**, 269-274.
- [S8] Z. Zhang, Y. Gu, S. Wang, Q. Li, M. Li and Z. Zhang, *Carbon*, 2016, **107**, 405-414.
- [S9] L. Ren, J. Zhao, S.-J. Wang, J. W. Zha, G. H. Hu and Z. M. Dang, *Compos. Sci. Technol.*, 2015, **107**, 107-112.
- [S10] Z. Shi, J. Wang, F. Mao, C. Yang, C. Zhang and R. Fan, *J. Mater. Chem. A*, 2017, **5**, 14575-14582.
